# Supplementary material for: Characteristic Metabolites and Antioxidant Activities of Essential Oils from Phlomoides rotata (Benth. ex Hook. f.) Mathiesen
Source: Preprints.org preprint supplement (doi:10.20944/preprints202402.0584.v1), 2024-02-09
Supplement: Supplementary file 1 [file Supplemental Table 2.xlsx]

## Sheet: Sheet1
Supplemental Table 2. The percentage of qualified and quantified compounds in the EOs from PR
							E8			C8			CF8			E9			C9			CF9			E10			C10			CF10
Codes	Compounds	CAS	LRIs a, c	LRIs b1	LRIs b2	LRIs d	FID	DB-5	FFAP	FID	DB-5	FFAP	FID	DB-5	FFAP	FID	DB-5	FFAP	FID	DB-5	FFAP	FID	DB-5	FFAP	FID	DB-5	FFAP	FID	DB-5	FFAP	FID	DB-5	FFAP
	FAs (16)						1.27731	0	67.5862	62.7943	37.503	77.9204	22.9137	0	44.3569	25.4473	0	58.0713	65.9875	57.7128	78.8215	36.8207	7.67808	54.8001	27.6645	0	55.9702	64.2734	41.7605	73.5611	34.6944	2.14639	50.9304
F1	Propanoic acid (3:0)	79-09-4	700, 1535	700	-	1535.46	0.096224	nd	nd	0.0291785	nd	0.00919542	0.0774784	nd	0.0927174	0.070491	nd	nd	0.0291316	nd	0.0211929	0.0583912	nd	0.0230352	0.0549287	nd	nd	0.0343504	nd	0.0101977	0.0639631	nd	0.0264805
F2	Hexanoic acid	142-62-1	990, 1846	988.519	-	1837.6	0.202524	nd	nd	0.0800636	nd	0.108984	0.0691527	nd	0.265887	0.155305	nd	nd	0.0342751	nd	0.165353	0.0838085	nd	0.386565	0.0680592	nd	0.0867808	0.04142	nd	0.174961	0.0675805	nd	0.407379
F3	Caprylic acid	124-07-2	1180, 2060	1179.25	-	2052.86	0.157797	nd	0.061554	0.0506607	nd	0.0852853	0.0910449	nd	0.205237	0.0618345	nd	nd	0.0694936	nd	0.0722546	0.122455	nd	0.134379	0.0969273	nd	0.109259	0.060052	nd	0.085538	0.0791135	nd	0.169327
F4	Nonanoic acid (9:0)	112-05-0	1267 [25] 1273, 2171	1268.53	-	2156.22	nd	nd	0.0641405	0.275962	nd	0.129411	0.599112	nd	0.345467	0.356387	nd	nd	0.29213	nd	0.0828755	0.591264	nd	0.238722	0.527457	nd	0.161532	0.321276	nd	0.206454	0.551769	nd	0.366631
F5	n-Decanoic acid (10:0)	334-48-5	1364 [25] 1373, 2276	1366.85	-	2262.15	nd	nd	0.163192	0.274352	nd	0.194722	0.331529	nd	0.397394	0.265345	nd	0.403901	0.385878	nd	0.34865	0.818675	nd	0.709626	0.270795	nd	0.309277	0.359455	nd	0.328164	0.662743	nd	0.605677
F6	Undecanoic acid (11:0)	112-37-8	1475, 2400	1474.54	-	2367.16	nd	nd	0.0588284	0.0395469	nd	0.0879086	0.121645	nd	0.122658	nd	nd	nd	0.00765273	nd	0.212508	0.0250043	nd	0.41098	0.0167785	nd	0.109412	0.0397704	nd	0.152737	0.0907944	nd	0.292509
F7	Dodecanoic acid	143-07-7	1565 [25] 1568, 2497	1563.67	-	2474.3	nd	nd	0.756849	0.936862	nd	0.864153	0.893095	nd	1.61209	0.744657	nd	0.865369	1.10976	nd	1.23674	1.77143	nd	2.07431	0.704829	nd	0.889475	0.943155	nd	1.14083	1.47587	nd	1.43544
F8	Tridecanoic acid (13:0)	638-53-9	1666, 2617	1662.4	-	2579.11	nd	nd	0.113531	0.0702394	nd	0.245699	0.12838	nd	0.466691	0.0398794	nd	0.200017	0.0567374	nd	0.272056	0.0702271	nd	0.474951	0.0845703	nd	0.274813	0.0837306	nd	0.212567	0.122419	nd	0.410718
F9	MA	544-63-8	1768, 2694	1760.4	-	2685	0.0617281	nd	3.64686	4.33206	nd	5.25339	2.71329	nd	5.3564	1.53706	nd	2.91241	3.08058	nd	4.16517	3.22728	nd	4.63883	1.75975	nd	3.35511	3.57472	nd	5.22325	3.47474	nd	5.05579
F10	Pentadecanoic acid	1002-84-2	1867, 2822	1862.11	-	2790.2	nd	nd	0.433715	0.209981	nd	0.646516	0.31279	nd	0.588819	0.255796	nd	0.633415	0.219883	nd	0.435243	0.435549	nd	0.616799	0.350552	nd	0.330304	0.285995	nd	0.61616	0.450373	nd	0.903983
F11	9E-Hexadecenoic acid	2091-29-4	1942, 2954	1939.21	-	2935.41	nd	nd	0.848166	0.624092	nd	0.778262	1.03584	nd	2.24446	0.209557	nd	nd	0.29329	nd	0.278925	0.683843	nd	0.516699	0.38749	nd	0.359871	0.329102	nd	0.267662	0.640181	nd	0.606643
F12	Palmitoleic acid (16:1, n-7)	373-49-9	1951, 2926	1947	-	2925.6	nd	nd	1.63699	tr	nd	1.01885	tr	nd	3.62015	tr	nd	1.05261	tr	nd	0.861809	tr	nd	1.12206	tr	nd	0.618791	tr	nd	0.842612	tr	nd	1.23545
F13	PA	57-10-3	1968, 2931	1959.85	1957.67	2894.3	0.65921	nd	47.1063	51.5258	37.503	60.0006	8.64159	nd	15.0222	17.5724	nd	44.112	57.0543	57.7128	63.5653	24.5271	7.67808	31.6121	19.0705	nd	40.7292	55.34	41.7605	56.3669	23.4123	2.14639	39.4144
F14	LA	60-33-3	2133, 3164	2128.69	-	2883.7	0.0306662	nd	7.67127	0.474341	nd	0.99005	3.22747	nd	8.15016	1.61212	nd	5.30476	0.376222	nd	0.842641	0.239169	nd	1.21847	1.30712	nd	4.38112	0.380594	nd	0.552882	0.268322	nd	nd
F15	OA	112-80-1	2141, 3173	2136.72	2144.72	2769.56	0.0691614	nd	2.66628	1.68087	nd	2.74915	4.19307	nd	5.86654	2.11564	nd	2.58684	1.72799	nd	2.89812	3.1596	nd	8.66036	2.40929	nd	3.16272	1.27202	nd	3.802	2.42644	nd	nd
F16	Stearic acid	57-11-4	2172, 3136	2161.11	-	2700.17	nd	nd	2.35846	2.19032	nd	4.75828	0.478247	nd	tr	0.450815	nd	tr	1.2501	nd	3.36265	1.00696	nd	1.96224	0.555427	nd	1.09255	1.20776	nd	3.57816	0.907758	nd	nd
	Esters of FAs (13)						1.38052	0	6.47959	3.53758	0	3.40993	7.05412	6.52207	10.793	10.5091	0	13.06	5.35211	0	6.71852	11.6444	11.063	14.985	12.4629	0	14.9328	6.38988	3.26364	8.31618	11.5191	18.4184	15.4906
EF1	Nonanoic acid, 9-oxo-, methyl ester	1931-63-1	1436, -	1436.98	-	2041.48	nd	nd	0.0223321	0.00975196	nd	0.0476676	0.00776026	nd	0.211671	nd	nd	nd	tr	nd	0.0939981	0.00705268	nd	0.164929	nd	nd	0.126062	nd	nd	0.108507	0.0123081	nd	0.207829
EF2	Methyl laurate	111-82-0	1524 [25] 1526, 1804	1522.52	-	1801.59	nd	nd	nd	0.032044	nd	0.0107268	0.0695286	nd	0.0508059	0.0304134	nd	tr	0.0374849	nd	0.0199616	0.0918688	nd	0.0902445	0.068594	nd	0.0449614	0.0439816	nd	0.0377807	0.0985543	nd	0.0713365
EF3	Methyl tetradecanoate	124-10-7	1725, 2005	1724.39	-	2008.24	nd	nd	0.0770003	0.261851	nd	0.138935	0.354999	nd	0.229734	0.1671	nd	0.175409	0.220155	nd	0.119741	0.435387	nd	0.30487	0.290028	nd	0.216743	0.291161	nd	0.19963	0.522863	nd	0.419374
EF4	Methyl palmitoleate	1120-25-8	1898, 2240	1901.26	-	2238.58	nd	nd	0.0678139	0.0754855	nd	0.0963356	0.10326	nd	0.231336	0.110436	nd	0.22975	0.0885481	nd	0.124829	0.208203	nd	0.288477	0.122997	nd	0.14387	0.0950267	nd	0.119535	0.165863	nd	0.220923
EF5	Methyl palmitate	112-39-0	1926, 2208	1923.97	1923.65	2213.9	0.136797	nd	1.40221	1.54008	nd	1.51857	2.08693	6.52207	3.484	2.14048	nd	3.09943	2.22084	nd	2.75893	5.15418	11.063	6.16631	3.04125	nd	3.71529	3.21575	3.26364	4.06682	5.87397	18.4184	7.49159
EF6	Ethyl palmitate	628-97-7	1993, 2251	1992.48	-	2253.35	0.589102	nd	0.0387815	0.287426	nd	0.0842881	0.18213	nd	0.214915	0.109891	nd	0.0793441	0.112573	nd	0.0915156	0.216522	nd	0.204115	0.165579	nd	0.111464	0.10804	nd	0.128681	0.432711	nd	0.270996
EF7	Methyl margarate	1731-92-6	2028, 2309	2024.69	-	2318.04	nd	nd	0.0156404	0.073987	nd	0.0799448	0.094139	nd	0.17325	0.078718	nd	nd	0.0619141	nd	0.0733682	0.11408	nd	0.190043	0.137427	nd	0.112086	0.108897	nd	0.127505	0.18368	nd	0.250287
EF8	Methyl oleate	112-62-9	2091, 2434	2091	2094.67	2438.92	0.129236	nd	0.798228	0.23722	nd	0.670722	1.25968	nd	1.79855	3.04122	nd	1.74939	0.488648	nd	1.8182	0.775629	nd	4.17002	3.26991	nd	2.31683	0.412615	nd	2.1612	0.527724	nd	3.98508
EF9	Methyl linoleate	112-63-0	2095 [25] 2092, 2482	2097.89	-	2485.41	0.507971	nd	1.90747	0.85924	nd	0.286867	2.49793	nd	2.38226	4.11698	nd	4.29688	1.47989	nd	0.552089	3.19156	nd	0.852279	4.83592	nd	4.01884	1.71274	nd	0.466119	2.98278	nd	0.72718
EF10	Methyl linolenate	301-00-8	2098, 2571	2098	-	2551.71	tr	nd	1.77602	tr	nd	0.0292119	tr	nd	0.972712	tr	nd	2.74393	tr	nd	0.0470951	tr	nd	0.0723723	tr	nd	3.25171	tr	nd	0.0301854	tr	nd	0.0315531
EF11	Methyl elaidate	1937-62-8	2110, 2445	2104.35	-	2446.13	0.0174105	nd	0.0177163	0.0428147	nd	0.0747735	0.0586618	nd	0.164835	0.0866311	nd	nd	0.0584863	nd	0.125283	0.145958	nd	0.276726	0.185871	nd	0.102405	0.0568814	nd	0.113418	0.139585	nd	0.255292
EF12	Methyl stearate	112-61-8	2124 [25] 2128, 2418	2123.2	-	2420.3	nd	nd	0.218212	0.117679	nd	0.297517	0.3391	nd	0.577787	0.627266	nd	0.181729	0.58142	nd	0.267106	1.30394	nd	0.74967	0.345348	nd	0.431051	0.344789	nd	0.462541	0.579114	nd	0.83163
EF13	Methyl 5,6-octadecadienoate	-	-, -	-	-	2514.8	un	nd	0.138165	un	nd	0.0743702	un	nd	0.301154	un	nd	0.504157	un	nd	0.626395	un	nd	1.4549	un	nd	0.341524	un	nd	0.294251	un	nd	0.727566
	C13-norisoprenoids (7)						0.232964	0	0.765827	0.233395	0	0.0835518	0.500826	0	0.683884	0.74806	0	0.857203	0.269946	0	0.103853	0.460107	0	0.242201	1.05742	0	1.43502	0.289576	0	0.247476	0.552474	0	0.432049
NI1	Dehydro-ar-ionene	30364-38-6	1354, 1732	1354.3	-	1728.6	0.0908115	nd	0.0517938	0.0318867	nd	nd	0.0152534	nd	0.0917086	nd	nd	nd	0.0206536	nd	nd	0.0126696	nd	nd	nd	nd	0.140806	nd	nd	0.017293	0.0447081	nd	0.0396763
NI2	trans-β-Damascenone	23726-93-4	1383 [25] 1386, 1823	1379.47	-	1807.6	nd	nd	0.346014	0.0257482	nd	tr	0.2221	nd	0.161714	0.592062	nd	0.461106	0.01561	nd	0.0208268	nd	nd	0.0336614	0.904547	nd	0.435391	0.0317735	nd	0.0185346	0.0474206	nd	0.0438469
NI3	2-Buten-1-one, 1-(2,6,6-trimethyl-1-cyclohexen-1-yl)-	35044-68-9	1417, 1830	1415	-	1800.81	tr	nd	tr	tr	nd	0.00536341	tr	nd	0.0254029	tr	nd	tr	tr	nd	tr	tr	nd	0.0150408	tr	nd	0.0345857	tr	nd	0.0290621	tr	nd	0.0356682
NI4	α-Ionone	127-41-3	1428 [25] 1426, 1840	1429.2	-	1833.97	nd	nd	nd	0.101737	nd	nd	0.166392	nd	nd	0.0435633	nd	nd	0.173898	nd	nd	0.320242	nd	tr	0.0517582	nd	nd	0.18508	nd	tr	0.308233	nd	tr
NI5	trans-Geranylacetone	3796-70-1	1453, 1859	1450.44	-	1849.17	nd	nd	0.110703	tr	nd	0.0468948	tr	nd	0.229573	tr	nd	0.140211	tr	nd	0.0437063	tr	nd	0.0956953	tr	nd	0.253381	tr	nd	0.0762827	tr	nd	0.12949
NI6	β-Ionon-5,6-epoxide	23267-57-4	1473, 1962	1471.56	-	1969.03	nd	nd	nd	0.0305506	nd	0.0194024	0.0364186	nd	0.0374712	nd	nd	nd	0.0281482	nd	0.022327	0.0619578	nd	0.0655053	nd	nd	0.00821084	0.0341392	nd	0.0658991	0.0831203	nd	0.138094
NI7	trans-β-Ionone	79-77-6	1486, 1940	1486.11	-	1919.66	0.142153	nd	0.257316	0.0434724	nd	0.0078297	0.0606624	nd	0.138014	0.112435	nd	0.255885	0.031636	nd	0.0130005	0.0652373	nd	0.0278582	0.10111	nd	0.562644	0.038583	nd	0.0365736	0.0689926	nd	0.0424915
	Alcohol Monoterpenes (AMs) (10)						0.620913	0	3.10572	3.75836	6.56121	1.82254	7.86935	20.8596	5.47575	9.50355	0	5.74572	4.83476	11.722	2.61642	9.52987	18.0156	5.13337	11.2835	22.3221	5.01543	6.14823	22.3901	3.06016	9.00537	16.3383	5.16431
AM1	cis-Linalool oxide	5989-33-3	1067 [25] 1074, 1444	1066.33	-	1440.98	0.0456319	nd	0.115196	0.804742	nd	0.420597	0.974246	nd	0.817811	0.337025	nd	0.211046	0.968478	nd	0.582701	2.32149	nd	1.30076	0.423883	nd	0.199228	1.33075	nd	0.70034	2.19956	nd	1.27865
AM2	trans-Linalool oxide	34995-77-2	1084 [25] 1086, 1452	1083.91	-	1468.08	0.0720443	nd	0.0702945	0.713503	nd	0.358451	0.762597	nd	0.581999	0.310197	nd	0.148525	0.860374	nd	0.515426	1.98766	nd	1.11559	0.32664	nd	0.153409	1.20112	nd	0.601318	1.90395	nd	1.02421
AM3	Linalool	78-70-6	1099, 1547	1098.71	1098.14	1551.9	0.145134	nd	2.24396	1.80137	6.56121	0.656211	5.07214	20.8596	3.3836	6.50719	nd	4.01217	2.39497	11.722	1.06904	4.12646	18.0156	1.87655	8.54508	22.3221	3.67383	3.01583	22.3901	1.25643	3.9725	16.3383	2.01832
AM4	Hotrienol	29957-43-5	1107, 1613	1107.04	-	1612.41	0.172904	nd	nd	0.0574852	nd	nd	0.112987	nd	nd	0.554462	nd	0.742801	0.150574	nd	nd	0.307794	nd	nd	0.203719	nd	0.379608	0.0915072	nd	nd	0.21942	nd	nd
AM5	cis-Linalool 3,7-oxide	14009-71-3	1170 [25] 1174, 1751	1168.57	-	1759.11	0.0285323	nd	nd	0.124679	nd	0.0410961	0.102191	nd	0.0414561	0.0392516	nd	nd	0.14662	nd	0.0726365	0.330554	nd	0.157536	0.0482822	nd	nd	0.215418	nd	0.089115	0.32559	nd	0.182467
AM6	trans-Linalool 3,7-oxide	39028-58-5	1173 [25] 1173, 1739	1171.93	-	1731.74	0.0727933	nd	nd	0.0428534	nd	0.0564534	0.120505	nd	0.0791693	0.254227	nd	nd	0.0571068	nd	0.0727581	0.067673	nd	0.132515	0.223334	nd	0.00802657	0.020202	nd	0.0646217	0.0638812	nd	0.164584
AM7	3,7-Octadiene-2,6-diol, 2,6-dimethyl-	13741-21-4	1190, 1945	1189.93	-	1943.81	nd	nd	nd	0.0112273	nd	0.0640695	0.0558037	nd	0.170686	0.0191798	nd	nd	0.0106413	nd	0.0572915	0.0271352	nd	0.118138	0.0169694	nd	0.0543876	0.00808569	nd	0.0751812	0.0191172	nd	0.127197
AM8	Nerol	106-25-2	1227 [25] 1228, 1797	1224.42	-	1796.89	0.0838727	nd	0.161176	0.0707191	nd	tr	0.224013	nd	0.0908416	0.658522	nd	0.189278	0.127331	nd	0.0186244	0.207863	nd	0.0290707	0.503583	nd	0.169079	0.128734	nd	0.021159	0.159979	nd	0.0204787
AM9	2-Hydroxycineol	18679-48-6	1228, 1845	1224	-	1846.48	tr	nd	nd	tr	nd	0.220761	tr	nd	0.0734782	tr	nd	nd	tr	nd	0.113974	tr	nd	0.268812	tr	nd	0.00774193	tr	nd	0.251996	tr	nd	0.348403
AM10	trans-Geraniol	106-24-1	1249 [25] 1255, 1847	1252.21	-	1845.75	nd	nd	0.515086	0.131779	nd	tr	0.444864	nd	0.236706	0.823491	nd	0.441901	0.118663	nd	0.113974	0.153242	nd	0.134406	0.992011	nd	0.370119	0.136578	nd	nd	0.141359	nd	tr
	C18-norditerpenoids (2)						0.137277	0	2.53811	3.29995	0	2.5694	4.65092	7.07034	6.0678	2.57042	0	2.469	2.21424	0	2.1959	4.94236	0	5.37857	3.96277	0	3.81875	3.50315	1.90807	3.62508	6.16892	17.0171	6.57423
ND1	Hexahydrofarnesyl acetone	502-69-2	1844, 2131	1842.56	1839.08	2119.3	0.129717	nd	1.91122	3.17456	nd	2.48423	4.12656	7.07034	5.24567	2.01675	nd	2.08269	2.16571	nd	2.10919	4.91572	nd	5.25094	2.95533	nd	2.92375	3.4332	1.90807	3.50901	6.08646	17.0171	6.36676
ND2	Farnesyl acetone	1117-52-8	1913 [25] 1919, 2384	1914.62	-	2361.6	0.00756056	nd	0.626895	0.125393	nd	0.0851761	0.524361	nd	0.822135	0.553669	nd	0.38631	0.0485372	nd	0.0867129	0.026644	nd	0.127629	1.00744	nd	0.895008	0.0699495	nd	0.116071	0.0824612	nd	0.207464
	ADs (2)						0.264379	0	5.75853	1.79094	0	1.76315	4.33631	0	6.71844	1.80164	0	2.35365	0.870678	0	0.863183	1.54307	0	1.64734	3.87678	0	4.54187	1.3803	0	1.66551	2.21946	0	2.63902
AD1	Isophytol	505-32-8	1948, 2296	1946.51	-	2290.03	nd	nd	0.303234	0.337086	nd	0.364631	1.11766	nd	0.849989	0.261611	nd	0.224634	0.240772	nd	0.216008	0.555258	nd	0.537838	0.453477	nd	0.366098	0.376064	nd	0.385133	0.742606	nd	0.78894
AD2	Phytol	150-86-7	2114, 2622	2110.41	-	2606.6	0.264379	nd	5.4553	1.45386	nd	1.39852	3.21865	nd	5.86845	1.54003	nd	2.12902	0.629905	nd	0.647175	0.987809	nd	1.10951	3.4233	nd	4.17577	1.00423	nd	1.28038	1.47686	nd	1.85008
	Als (21)						6.60861	0	1.63334	1.67369	0	2.42776	21.4299	0	3.17592	1.54601	0	1.0832	1.63496	0	1.11285	2.26006	0	4.86879	1.96325	0	1.90889	1.34824	0	1.41239	3.06302	0	3.03017
A1	Tridecane	629-50-5	1300, 1300	1300	-	1300	nd	nd	nd	0.0703792	nd	nd	nd	nd	0.0132724	0.121455	nd	nd	nd	nd	nd	nd	nd	nd	nd	nd	tr	nd	nd	nd	nd	nd	0.0101042
A2	Farnesane	3891-98-3	1366, 1354	1370.65	-	1353.81	0.747322	nd	nd	0.125491	nd	0.0188395	0.171465	nd	0.0262447	0.359658	nd	0.11232	0.110222	nd	nd	0.15729	nd	0.0173964	0.2711	nd	0.0162547	0.142099	nd	0.00740667	0.120334	nd	0.0162942
A3	Tetradecane	629-59-4	1400, 1400	1400	-	1400	0.0361494	nd	0.0414304	0.00564587	nd	tr	0.0996253	nd	0.0526392	0.0524346	nd	nd	tr	nd	nd	0.0367344	nd	0.0115214	0.0295748	nd	0.0415255	0.0189135	nd	tr	0.071771	nd	0.0188369
A4	Pentadecane	629-62-9	1500, 1500	1500	-	1500	nd	nd	0.0416403	0.0145493	nd	0.030387	0.0328242	nd	0.101815	nd	nd	nd	0.0211245	nd	0.0127908	0.0320494	nd	0.0539744	0.0786114	nd	0.0593507	0.0407467	nd	0.0164702	0.0804957	nd	0.0726584
A5	Hexadecane	544-76-3	1600, 1600	1600	-	1600	nd	nd	0.0489559	tr	nd	0.0537938	tr	nd	0.119142	tr	nd	nd	tr	nd	0.0421737	tr	nd	0.118116	tr	nd	0.0612843	tr	nd	0.0542721	tr	nd	0.15985
A6	Hexadecane, 2-methyl-	1560-92-5	1664, 1658	1660.36	-	1659.71	nd	nd	0.0122506	0.129979	nd	0.026056	0.121132	nd	0.0365329	0.244133	nd	nd	0.157724	nd	0.0135192	0.205646	nd	0.0293675	0.160603	nd	nd	0.140171	nd	0.0180939	0.17166	nd	0.0183171
A7	Pentadecane, 2,6,10,14-tetramethyl-	1921-70-6	1687, 1670	1685.87	-	1669	nd	nd	0.043984	0.0291605	nd	0.0568017	0.0259183	nd	0.0712039	0.00834262	nd	nd	0.0104483	nd	0.0412456	0.0274853	nd	0.0994345	0.0271683	nd	0.0774136	0.050684	nd	0.0799868	0.0712657	nd	0.179141
A8	Heptadecane	629-78-7	1700, 1700	1700	-	1700	nd	nd	0.0970055	0.0881494	nd	0.100304	0.153481	nd	0.249947	0.0703754	nd	0.108762	0.0835877	nd	0.0920867	0.193178	nd	0.268074	0.161912	nd	0.132845	0.131642	nd	0.133784	0.338553	nd	0.302271
A9	Phytan	638-36-8	1792, -	1791.63	-	1774.6	nd	nd	0.110545	0.0490899	nd	0.0599681	0.0769969	nd	0.157971	0.0520381	nd	nd	0.0336744	nd	0.0364534	0.0703354	nd	0.106235	0.0676868	nd	0.0854181	0.0386534	nd	0.0768251	0.0826529	nd	0.150877
A10	Octadecane	593-45-3	1800, 1800	1800	-	1800	nd	nd	0.0135133	0.0678562	nd	0.0375439	0.126277	nd	0.101612	0.0408045	nd	tr	0.0424386	nd	0.0239539	0.0900199	nd	0.105285	0.0716594	nd	0.04842	0.0452425	nd	0.0552179	0.142222	nd	0.142673
A11	Nonadecane	629-92-5	1900, 1900	1900	-	1900	nd	nd	0.0335181	tr	nd	0.0317117	tr	nd	0.0676871	tr	nd	nd	tr	nd	0.0193015	tr	nd	0.0272689	tr	nd	0.00732984	tr	nd	0.0217084	tr	nd	0.0546957
A12	Eicosane	112-95-8	2000, 2000	2000	-	2000	0.0918007	nd	0.0320365	0.07327	nd	0.0428702	0.252156	nd	0.0823038	nd	nd	nd	0.0549153	nd	0.023566	0.089088	nd	0.0735522	0.049877	nd	nd	0.0478837	nd	0.0318215	0.117552	nd	0.0850576
A13	Heneicosane	629-94-7	2100, 2100	2100	-	2100	nd	nd	0.0243102	nd	nd	0.0366067	nd	nd	0.0777775	nd	nd	nd	nd	nd	0.0287277	nd	nd	0.102739	nd	nd	0.110263	nd	nd	0.0724876	nd	nd	0.13577
A14	Docosane	629-97-0	2200, 2200	2200	-	2200	0.752353	nd	0.0240088	0.218237	nd	0.057647	2.19191	nd	0.0967085	0.120448	nd	nd	0.0983657	nd	0.0580095	0.121316	nd	0.153528	0.215035	nd	0.0712397	0.0979066	nd	0.0869782	0.308293	nd	0.173391
A15	Tricosane	638-67-5	2300, 2300	2300	-	2300	1.19844	nd	0.168398	0.275639	nd	0.192765	3.91884	nd	0.428064	0.210019	nd	0.279737	0.255073	nd	0.223982	0.484968	nd	0.537954	0.251944	nd	0.219654	0.24863	nd	0.208109	0.552281	nd	0.413248
A16	Tetracosane	646-31-1	2400, 2400	2400	-	2400	1.56824	nd	0.136766	0.201449	nd	0.12982	5.23704	nd	0.271318	0.0878536	nd	nd	0.449137	nd	0.120258	0.222724	nd	0.3324	0.347143	nd	0.0764403	0.101441	nd	0.0979327	0.344482	nd	0.181915
A17	Pentacosane	629-99-2	2500, 2500	2500	-	2500	1.25466	nd	0.188553	0.283831	nd	0.244954	4.97125	nd	0.468108	0.204221	nd	0.405522	0.248267	nd	0.191981	0.415433	nd	0.59495	0.230935	nd	0.151446	0.191272	nd	0.155426	0.444159	nd	0.377973
A18	Hexacosane	630-01-3	2600, 2600	2600	-	2600	0.95964	nd	0.170893	0.111339	nd	0.0981758	4.05099	nd	0.29044	0.0956841	nd	0.176862	0.0666565	nd	0.0599553	0.113795	nd	0.13633	nd	nd	0.244056	0.0529579	nd	0.0583024	0.217303	nd	0.152264
A19	Heptacosane	593-49-7	2700, 2700	2700	-	2700	nd	nd	0.205353	nd	nd	0.928863	nd	nd	tr	nd	nd	nd	nd	nd	tr	nd	nd	1.13287	nd	nd	0.249852	nd	nd	tr	nd	nd	tr
A20	Octacosane	630-02-4	2800, 2800	2800	-	2800	nd	nd	0.240179	nd	nd	0.27674	nd	nd	0.46313	nd	nd	nd	nd	nd	0.124848	nd	nd	0.411934	nd	nd	0.252928	nd	nd	0.236733	nd	nd	0.384832
A21	Nonacosane	630-03-5	2900, 2900	2900	-	2900	nd	nd	tr	nd	nd	tr	nd	nd	tr	nd	nd	nd	nd	nd	tr	nd	nd	0.555863	nd	nd	nd	nd	nd	tr	nd	nd	nd
	Others (28)						3.29106	0	1.04934	2.33015	1.96263	0.996513	3.97735	3.22422	2.9585	5.44112	0	2.40905	3.10038	0	1.31066	6.18454	7.46856	2.61412	6.47206	0	2.89654	3.42654	3.65809	1.52095	5.92143	4.65628	2.35166
O1	1-Pentanol	71-41-0	762 [25] 765, 1250	763.505	-	1249.85	0.0469603	nd	nd	0.0163083	nd	0.00881088	0.0129017	nd	0.0257877	0.0659149	nd	nd	tr	nd	0.0170554	0.0265508	nd	0.0171054	0.0140091	nd	nd	0.00833052	nd	0.0143856	0.0290204	nd	0.0245057
O2	3-Hexanone	589-38-8	784, 1053	782.474	-	-	0.0810888	nd	0.00860552	0.0161768	nd	0.010539	0.0343247	nd	0.0185469	0.0928261	nd	nd	0.0246571	nd	0.00995316	0.0301527	nd	0.0111035	0.0778665	nd	0.0260717	0.0336496	nd	0.00934206	0.0311596	nd	0.014513
O3	2-Hexanone	591-78-6	790, 1083	791.856	-	-	0.0528674	nd	0.0330333	0.0156815	nd	tr	0.0438713	nd	0.0183232	0.0738776	nd	nd	0.0275442	nd	0.0105195	0.0350141	nd	0.0102199	0.0875306	nd	0.0262567	0.0290069	nd	0.0123536	0.0337723	nd	0.0123499
O4	2-Hexanol	626-93-7	796 [25] 801, 1220	800	-	1220.91	tr	nd	nd	tr	nd	0.011668	tr	nd	0.0365917	tr	nd	0.0701703	tr	nd	0.0146093	tr	nd	0.0196756	tr	nd	0.0547794	tr	nd	0.0192503	tr	nd	0.0225766
O5	3-Hexanol	623-37-0	797, 1198	800	-	1198.07	tr	nd	0.0165059	tr	nd	0.00477851	tr	nd	0.0362533	tr	nd	0.0543175	tr	nd	0.0105766	tr	nd	0.0213872	tr	nd	0.0534874	tr	nd	0.0147259	tr	nd	0.0229071
O6	Hexanal	66-25-1	800, 1083	800	799.1	-	0.109494	nd	nd	0.241243	1.96263	0.0719804	0.464364	3.22422	0.23793	0.198224	nd	nd	0.232258	nd	0.0768913	0.470789	7.46856	0.145585	0.219151	nd	0.027716	0.307841	nd	0.0728778	0.352	4.65628	0.127516
O7	1-Octen-3-one	4312-99-6	972 [25] 979, 1300	971.381	-	1305.24	0.0291965	nd	nd	0.0192512	nd	0.00828152	0.0278288	nd	0.0360144	0.0871432	nd	0.0217942	0.0299819	nd	0.0235343	0.0982917	nd	0.0431375	0.109475	nd	0.0626505	0.0246029	nd	0.0256581	0.0616501	nd	0.0428573
O8	1-Octen-3-ol	3391-86-4	974 [25] 980, 1450	972.463	976.453	1453.8	0.049179	nd	0.388174	0.401486	nd	0.136441	0.865996	nd	0.670599	3.10174	nd	1.5714	1.25785	nd	0.585783	2.39372	nd	1.03579	3.75707	nd	1.45804	1.35043	3.65809	0.625196	2.08863	nd	1.02306
O9	Sulcatone	110-93-0	981 [25] 986, 1338	979.922	-	1340.17	nd	nd	nd	0.157888	nd	tr	0.109091	nd	0.0258856	nd	nd	nd	0.220803	nd	0.00738906	0.622618	nd	tr	0.0276744	nd	0.0378484	0.144168	nd	0.00729828	0.575636	nd	0.00943136
O10	3-Octanol	589-98-0	994, 1393	992.651	-	1396.6	nd	nd	0.0136692	nd	nd	tr	0.0397457	nd	0.0181806	0.146714	nd	0.158031	0.0882086	nd	0.0625174	0.175045	nd	0.0904267	0.10748	nd	0.0552789	0.0599847	nd	0.0353581	0.0983346	nd	0.0455867
O11	Lavender lactone	1073-11-6	1043, 1684	1042.12	-	1656.37	nd	nd	nd	nd	nd	tr	0.051004	nd	0.0197328	nd	nd	nd	0.022657	nd	0.022507	0.04217	nd	0.0382218	nd	nd	nd	nd	nd	0.0299279	0.052488	nd	0.0383124
O12	(-)-cis-Rose oxide	3033-23-6	1106 [25] -, 1337 [26] -	1107	-	1351.19	tr	nd	nd	tr	nd	nd	tr	nd	0.019197	tr	nd	0.140001	tr	nd	0.0626222	tr	nd	0.0931707	tr	nd	0.0946653	tr	nd	0.0251506	tr	nd	0.0656797
O13	(-)-trans-Rose oxide	5258-11-7	1122 [25] 1127, 1367	1124.56	-	1364.76	nd	nd	nd	0.00784077	nd	nd	0.0405193	nd	0.0146899	0.151505	nd	nd	0.0550584	nd	0.0279967	0.157477	nd	0.0622542	0.0740945	nd	0.0302156	0.0274583	nd	0.0170603	0.0593212	nd	0.0213936
O14	(E)-2-Nonenal	18829-56-6	1162, 1534	1160.29	-	1530.32	0.473786	nd	0.0266013	0.0129063	nd	nd	0.0312709	nd	0.0480307	0.0634039	nd	nd	0.0161957	nd	nd	0.039825	nd	0.012361	0.0358774	nd	0.0628875	0.00592502	nd	0.0064019	0.0264158	nd	0.00922695
O15	Benzoic acid, 4-methyl-, methyl ester	99-75-2	1215, 1740	1216.74	-	1732.59	0.0890874	nd	nd	0.300361	nd	0.0171145	0.329995	nd	0.0502824	0.137546	nd	nd	0.405893	nd	0.0591257	0.732852	nd	0.192907	0.125862	nd	0.0863157	0.477184	nd	0.0855046	0.617576	nd	0.0903638
O16	α-Citral	141-27-5	1264 [25] 1270, 1732	1265.57	-	1721.92	nd	nd	0.0209498	0.0540704	nd	0.0102932	0.150629	nd	0.106429	0.0159584	nd	nd	0.0601719	nd	0.0233763	0.0823502	nd	0.0403335	0.101778	nd	0.068562	0.0771568	nd	0.0297881	0.102399	nd	0.0429412
O17	Geranyl formate	105-86-2	1298 [25] 1300, 1695	1297.15	-	1705.26	0.241839	nd	0.0106706	0.0491209	nd	0.0115149	0.274564	nd	0.214384	0.121455	nd	nd	0.0496072	nd	0.0170464	0.0929518	nd	0.0281736	0.111261	nd	0.0368401	0.0808477	nd	nd	0.13466	nd	0.0174586
O18	1-Tetradecene	1120-36-1	1388 [25] 1392, 1443	1388.75	-	1445.44	0.0273735	nd	0.0114293	0.0752276	nd	nd	0.0173224	nd	0.0647208	nd	nd	nd	0.01457	nd	nd	0.0327698	nd	0.0119545	nd	nd	0.0234403	nd	nd	nd	0.0137722	nd	nd
O19	β-Caryophyllene	87-44-5	1417 [25] 1419, 1595	1415.19	-	1583.2	1.40905	nd	0.078106	0.156256	nd	0.0812284	0.283871	nd	0.0750258	0.499533	nd	0.234898	0.181601	nd	0.0333751	0.299356	nd	0.0486511	0.295643	nd	0.118092	0.19877	nd	0.0231309	0.28267	nd	0.0486157
O20	α-Humulene	6753-98-6	1452 [25] 1454, 1667	1449	-	1657.57	nd	nd	nd	0.0603404	nd	0.137361	0.257316	nd	0.00807065	0.247074	nd	nd	0.0511464	nd	tr	0.0941105	nd	tr	0.495905	nd	nd	0.0996113	nd	nd	0.156427	nd	0.000549327
O21	2(4H)-Benzofuranone, 5,6,7,7a-tetrahydro-4,4,7a-trimethyl-	15356-74-8	1538, 2327	1540.02	-	2283.44	0.0615585	nd	nd	0.064689	nd	tr	0.143528	nd	0.0792276	0.0772147	nd	nd	0.0252928	nd	0.0311386	0.0327673	nd	0.0366592	0.200663	nd	0.0109941	0.0601867	nd	0.0511848	0.0751147	nd	0.0136274
O22	Cetene	629-73-2	1592, 1648	1590.8	-	1646.87	nd	nd	0.0264477	0.0231019	nd	0.137361	0.0363502	nd	0.0699077	nd	nd	nd	0.0135117	nd	0.0181099	0.0384724	nd	0.035839	nd	nd	0.0430827	0.0134904	nd	0.0163185	0.039381	nd	0.0321724
O23	Cedrol	77-53-2	1600 [25] 1598, 2116	1600	-	2086.15	nd	nd	0.0561448	0.142718	nd	0.0573367	0.209583	nd	0.12941	0.165366	nd	nd	0.123725	nd	0.0848662	0.285757	nd	0.214507	0.230553	nd	0.077989	0.166519	nd	0.0737006	0.322059	nd	0.139334
O24	Neophytadiene	504-96-1	1837, 1922	1837.94	-	1925.9	0.619584	nd	0.0919986	0.289384	nd	0.0276627	0.178716	nd	0.0974485	0.095205	nd	nd	0.0511796	nd	nd	0.0931105	nd	0.0222788	0.0799101	nd	0.0578685	0.0778883	nd	0.0309103	0.354041	nd	0.0363763
O25	1-Hexadecanol	36653-82-4	1874 [25] 1880, 2382	1876.78	-	2374.8	nd	nd	0.0487516	0.0674049	nd	0.0570567	0.0997899	nd	0.121635	0.0293231	nd	nd	0.0426516	nd	0.0163067	0.0656177	nd	0.0445963	0.0733496	nd	0.0421712	0.0536006	nd	0.030234	0.100618	nd	0.0538479
O26	1-Heptadecanol	1454-85-9	1984, 2475	1980.08	-	2465.72	nd	nd	nd	0.0203035	nd	nd	0.0631042	nd	0.0852228	nd	nd	nd	nd	nd	nd	0.0357773	nd	0.0400756	0.0307207	nd	nd	nd	nd	nd	0.0793991	nd	0.0447603
O27	(E)-Phytol acetate	10236-16-5	2218 [25] -, -	2218.42	-	2512.29	nd	nd	0.0868771	0.13839	nd	0.158032	0.211664	nd	0.493435	0.0711022	nd	nd	0.101036	nd	0.0953636	0.206989	nd	0.231384	0.216191	nd	0.196495	0.129885	nd	0.26519	0.23489	nd	0.326905
O28	1,8(2H,5H)-Naphthalenedione, hexahydro-8a-methyl-, cis-	83406-41-1	-, -	-	-	2126.59	un	nd	0.131374	un	nd	0.0370815	un	nd	0.137539	un	nd	0.158434	un	nd	nd	un	nd	0.063343	un	nd	0.144797	un	nd	nd	un	nd	0.024796
	Introduced (8)						70.8337	100	6.26151	9.27398	53.9731	4.33865	12.4454	62.3238	4.85502	23.9408	100	5.61584	6.97089	30.5652	1.44354	11.9928	55.7747	2.58221	14.9373	77.6779	4.14794	5.9494	27.0196	1.39483	8.50371	41.4234	1.99766
I1	β-Pinene	127-91-3	974 [25] 979, 1112	972	-	1113.58	tr	nd	0.0433707	tr	nd	0.00934083	tr	nd	nd	tr	nd	nd	tr	nd	nd	tr	nd	0.00786858	tr	nd	nd	tr	nd	nd	tr	nd	0.00624616
I2	β-Myrcene	123-35-3	988 [25] 991, 1161	989	-	1166.54	tr	nd	0.0490473	tr	nd	0.0405867	tr	nd	nd	tr	nd	nd	tr	nd	nd	tr	nd	0.00559459	tr	nd	nd	tr	nd	nd	tr	nd	nd
I3	p-Cymene	99-87-6	1025, 1272	1020.61	-	1272.3	1.1133	nd	0.149568	0.259207	nd	0.259236	0.262491	nd	0.0738801	0.867186	nd	0.124455	0.117225	nd	0.0169412	0.225807	nd	0.0368687	0.338768	nd	0.103805	0.161937	nd	0.0180225	0.216356	nd	0.0404453
I4	Limonene	138-86-3	1030, 1200	1026.18	1026.27	1202.9	10.4291	nd	3.06617	3.8787	36.4327	2.79327	1.80385	5.84106	0.660355	8.88529	nd	1.41859	0.872427	nd	0.184728	2.32904	8.13492	0.484158	2.52866	7.28138	0.743457	1.2002	nd	0.119733	1.45735	nd	0.287351
I5	γ-Terpinene	99-85-4	1053, 1246	1054.45	-	1246.8	1.32527	nd	0.157539	0.445366	nd	0.154538	0.371822	nd	nd	0.929401	nd	nd	0.745234	nd	nd	0.580287	nd	tr	0.303005	nd	0.0116666	0.22688	nd	nd	0.611576	nd	0.0116493
I6	Isoterpinolene	586-63-0	1086, 1286	1084	-	1287.39	tr	nd	nd	tr	nd	0.0200318	tr	nd	nd	tr	nd	nd	tr	nd	nd	tr	nd	nd	tr	nd	nd	tr	nd	nd	tr	nd	nd
I7	Terpinen-4-ol	562-74-3	1174 [25] 1177, 1602	1173.68	-	1595	nd	nd	0.110716	0.0850853	nd	0.0263896	0.141244	nd	0.137937	0.0353859	nd	0.158138	0.0520499	nd	0.0384234	0.069945	nd	0.0541336	0.00747725	nd	0.0974521	0.0545891	nd	0.0236743	0.104281	nd	0.044118
I8	α-Terpineol	98-55-5	1186 [25] 1189, 1697	1185.43	1191.13	1690	57.9661	100	2.6851	4.60563	17.5404	1.03526	9.86595	56.4827	3.98285	13.2235	100	3.91466	5.18396	30.5652	1.20345	8.78775	47.6398	1.9891	11.7594	70.3965	3.19156	4.30579	27.0196	1.2334	6.11415	41.4234	1.60785
Total (107)							84.6468	100	95.1781	88.6924	100	95.3319	85.1779	100	85.0852	81.508	100	91.665	91.2354	100	95.1864	85.378	100	92.2517	83.6804	100	94.6675	92.7087	100	94.8037	81.6479	100	88.6102
			Please note that in this study, the LRIs labeled as b1 and b2 were obtained using a DB-5 column in gas chromatography with flame ionization detector (GC-FID) and gas chromatography-mass spectrometer (GC-MS) setups, respectively. Additionally, the LRIs denoted as d were obtained employing a free FA phase (FFAP) column in a GC-MS system. The abbreviations "E," "C," and "CF" correspond to "essential…
	[26] Adams, R.P. Identification of essential oil components by gas chromatography/mass spectrometry, ed. 4.1. Allured publishing; Illinois, America, 2017; p. 1-804.
	[27] Flavornet by Terry Acree & Heinrich Arn, https://www.flavornet.org/info/3033-23-6.html (accessed on 3th January 2024).
